# Supplementary material for: A Combined Nucleic Acid and Protein Analysis in Friedreich Ataxia: Implications for Diagnosis, Pathogenesis and Clinical Trial Design
Source: PubMed Central journal article supplement (PMC3055871; doi:10.1371/journal.pone.0017627), 2011-03-11

**A**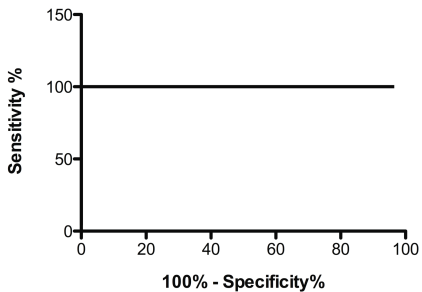**B**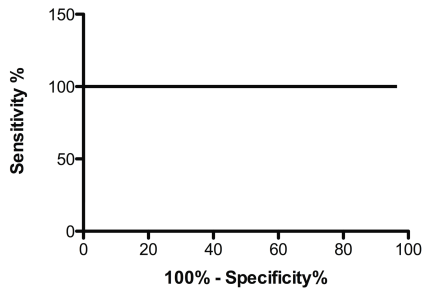**C**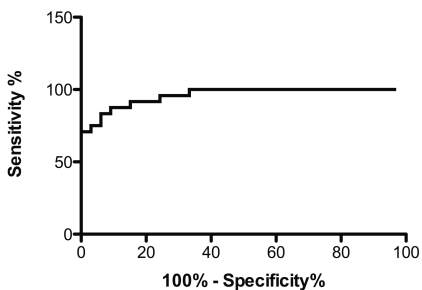**D**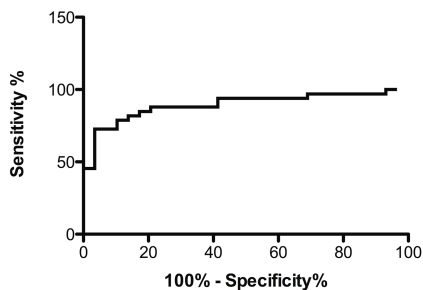**E**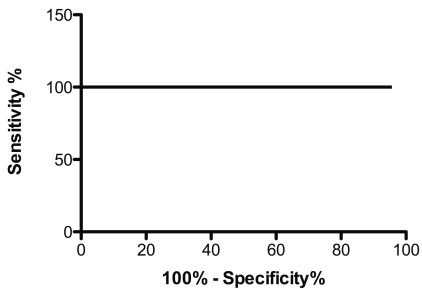**F**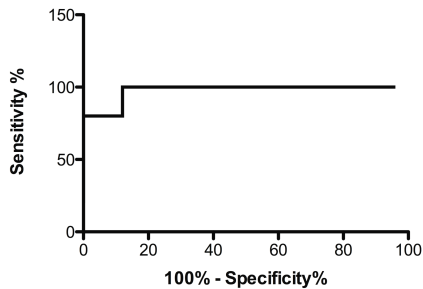**G**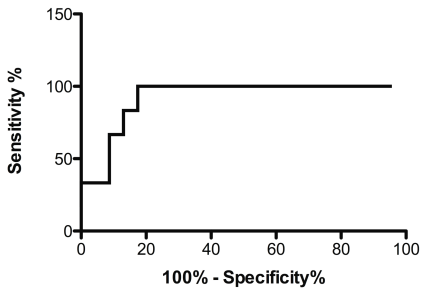**H**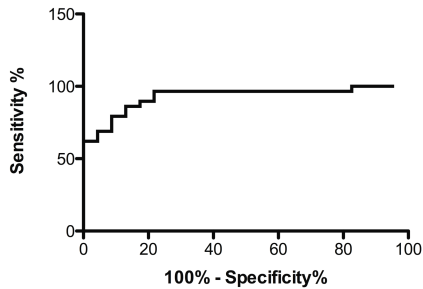

Supplement: pone.0017627.s001.pdf [file pone.0017627.s001.pdf]
